# Supplementary material
Source: publisher figshare collection journal article supplement (https://sage.figshare.com/ndownloader/files/22826843)
Supplement: Supplementary file 1 [file 22826843]

# Supplementary Table 1.

Results of multinomial logistic regression analysis showing the impact of anticholinergic burden in middle-aged women of the Aberdeen Prospective Osteoporosis Screening Study on incident falls in the 12 months prior to follow up, complete cases only (N=1,695).

|                      |              |              | No falls<br>N=1,439 |  | 1 fall<br>N=126 |   | Recurrent falls ( $\geq 2$ falls)<br>N=130 |        |
|----------------------|--------------|--------------|---------------------|--|-----------------|---|--------------------------------------------|--------|
|                      |              |              |                     |  | OR (95% CI)     | P | OR (95% CI)                                | P      |
| Model 1 <sup>a</sup> | ACB = 0      | Base outcome | Ref                 |  |                 |   | Ref                                        |        |
|                      | ACB = 1      |              | 0.90 (0.43-1.89)    |  | 0.78            |   | 1.71 (0.95-3.10)                           | 0.08   |
|                      | ACB $\geq 2$ |              | 1.23 (0.55-2.76)    |  | 0.61            |   | 2.69 (1.46-4.95)                           | 0.002* |
| Model 2 <sup>b</sup> | ACB = 0      | Base outcome | Ref                 |  |                 |   | Ref                                        |        |
|                      | ACB = 1      |              | 0.86 (0.41-1.82)    |  | 0.69            |   | 1.63 (0.90-2.98)                           | 0.11   |
|                      | ACB $\geq 2$ |              | 1.23 (0.55-2.76)    |  | 0.62            |   | 2.68 (1.44-4.97)                           | 0.002* |
| Model 3 <sup>c</sup> | ACB = 0      | Base outcome | Ref                 |  |                 |   | Ref                                        |        |
|                      | ACB = 1      |              | 0.84 (0.40-1.78)    |  | 0.65            |   | 1.57 (0.86-2.88)                           | 0.14   |
|                      | ACB $\geq 2$ |              | 1.17 (0.52-2.65)    |  | 0.70            |   | 2.57 (1.37-4.82)                           | 0.003* |
| Model 4 <sup>d</sup> | ACB = 0      | Base outcome | Ref                 |  |                 |   | Ref                                        |        |
|                      | ACB = 1      |              | 0.84 (0.40-1.79)    |  | 0.66            |   | 1.59 (0.87-2.92)                           | 0.14   |
|                      | ACB $\geq 2$ |              | 1.17 (0.52-2.65)    |  | 0.71            |   | 2.54 (1.35-4.78)                           | 0.004* |

CI = confidence interval; OR = odds ratio

\* = significant result at a significance level of  $P < 0.05$

Prevalence of ACB scores: ACB=0 (N=1,485); ACB=1 (N=124); ACB=2 (N=86)

<sup>a</sup>Model 1: unadjusted.

<sup>b</sup>Model 2: adjusted for age, national deprivation category, physical activity level and body mass index.

<sup>c</sup>Model 3: as model 2 additionally adjusted for history of rheumatoid arthritis, osteoarthritis and asthma.

<sup>d</sup>Model 4: as model 3 additionally adjusted for incident falls in the 12 months prior to baseline.

**FIGURES**
